# Supplementary material for: Fluorescence probing of metal-ion-mediated hybridization of oligonucleotides
Source: Royal Society of Chemistry journal article supplement (doi:10.1039/c4ra15136d), 2015-01-01
Supplement: c4ra15136d1.pdf [file c4ra15136d1.pdf]

## Supporting Information for

# Fluorescence Probing of Metal-Ion-Mediated Hybridization of Oligonucleotides

Sharmin Taherpour\* and Tuomas Lönnberg

*Department of Chemistry, University of Turku, Vatselankatu 2, FIN-20014 Turku, Finland*

## CONTENTS

|                    |                                                                                                                                                           |     |
|--------------------|-----------------------------------------------------------------------------------------------------------------------------------------------------------|-----|
| <b>Figure S1.</b>  | HPLC trace of crude oligonucleotide <b>ON4a</b>                                                                                                           | S2  |
| <b>Figure S2.</b>  | HPLC trace of purified oligonucleotide <b>ON4a</b>                                                                                                        | S2  |
| <b>Figure S3.</b>  | ESI mass spectrum of purified oligonucleotide <b>ON4a</b>                                                                                                 | S3  |
| <b>Figure S4.</b>  | HPLC trace of crude oligonucleotide <b>ON4b</b>                                                                                                           | S4  |
| <b>Figure S5.</b>  | HPLC trace of purified oligonucleotide <b>ON4b</b>                                                                                                        | S4  |
| <b>Figure S6.</b>  | ESI mass spectrum of purified oligonucleotide <b>ON4b</b>                                                                                                 | S5  |
| <b>Figure S7.</b>  | HPLC trace of crude oligonucleotide <b>ON4c</b>                                                                                                           | S6  |
| <b>Figure S8.</b>  | HPLC trace of purified oligonucleotide <b>ON4c</b>                                                                                                        | S6  |
| <b>Figure S9.</b>  | ESI mass spectrum of purified oligonucleotide <b>ON4c</b>                                                                                                 | S7  |
| <b>Figure S10.</b> | HPLC trace of crude oligonucleotide <b>ON5b</b>                                                                                                           | S8  |
| <b>Figure S11.</b> | HPLC trace of purified oligonucleotide <b>ON5b</b>                                                                                                        | S8  |
| <b>Figure S12.</b> | ESI mass spectrum of purified oligonucleotide <b>ON5b</b>                                                                                                 | S9  |
| <b>Figure S13.</b> | Fluorescence spectra of <b>ON1a</b> and duplexes <b>ON1a:ON4a</b> , <b>ON1a:ON4b</b> and <b>ON1a:ON4c</b> in the absence and presence of $\text{Cu}^{2+}$ | S10 |
| <b>Figure S14.</b> | Fluorescence spectra of <b>ON1b</b> and duplexes <b>ON1b:ON4a</b> , <b>ON1b:ON4b</b> and <b>ON1b:ON4c</b> in the absence and presence of $\text{Cu}^{2+}$ | S11 |
| <b>Figure S15.</b> | Fluorescence spectra of <b>ON2</b> and duplex <b>ON2:ON7</b> in the absence and presence of $\text{Cu}^{2+}$                                              | S12 |
| <b>Figure S16.</b> | Fluorescence spectra of <b>ON3a</b> and duplexes <b>ON3a:ON5a</b> and <b>ON3a:ON5b</b> in the absence and presence of $\text{Cu}^{2+}$                    | S13 |
| <b>Figure S17.</b> | Fluorescence spectra of <b>ON3b</b> and duplexes <b>ON3b:ON5a</b> and <b>ON3b:ON5b</b> in the absence and presence of $\text{Cu}^{2+}$                    | S14 |
| <b>Figure S18.</b> | Fluorescence spectra of <b>ON3c</b> and duplexes <b>ON3c:ON5a</b> and <b>ON3c:ON5b</b> in the absence and presence of $\text{Cu}^{2+}$                    | S15 |
| <b>Figure S19.</b> | Absorbance of <b>1</b> at 330 nm as a function of $[\text{Cu}^{2+}]$ .                                                                                    | S16 |
| <b>Figure S20.</b> | UV spectrum of duplex <b>ON1c:ON4c</b> at varying concentrations of $\text{Cu}^{2+}$                                                                      | S17 |

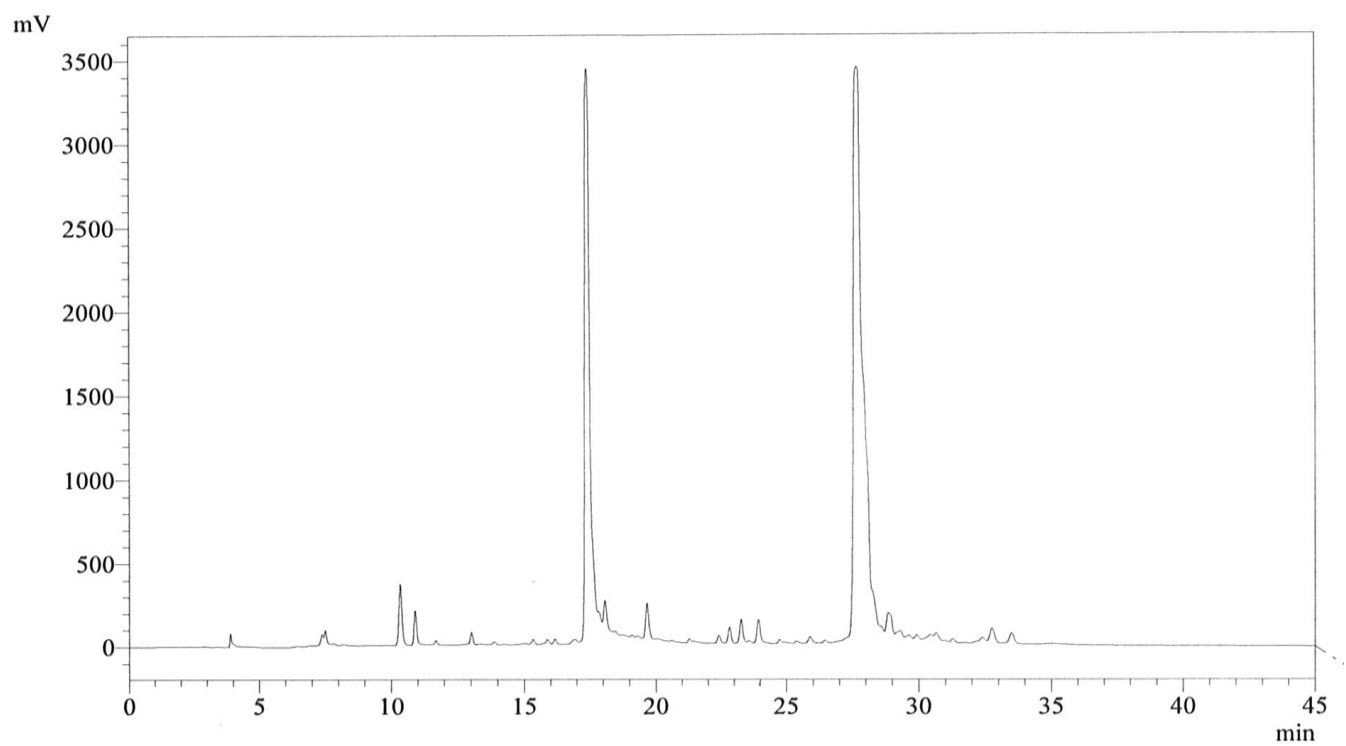

**Figure S1.** HPLC trace of crude oligonucleotide **ON4a**

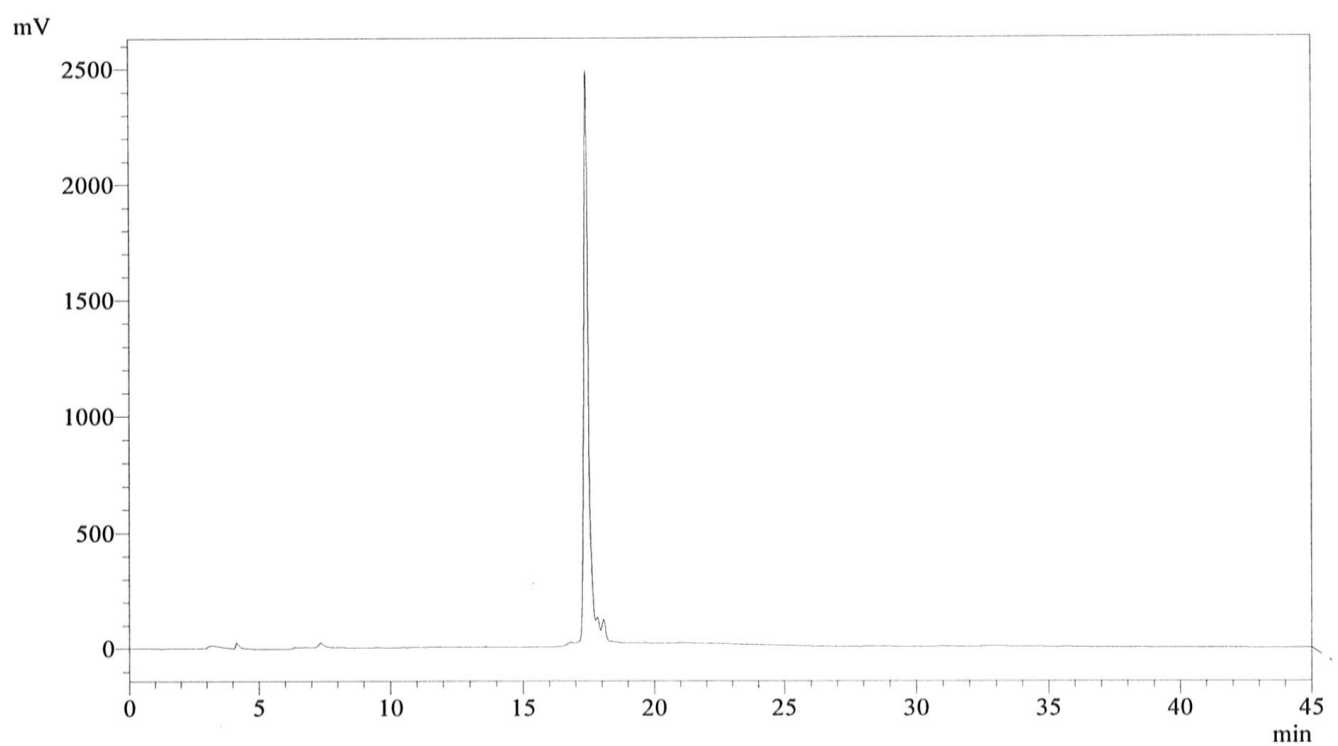

**Figure S2.** HPLC trace of purified oligonucleotide **ON4a**

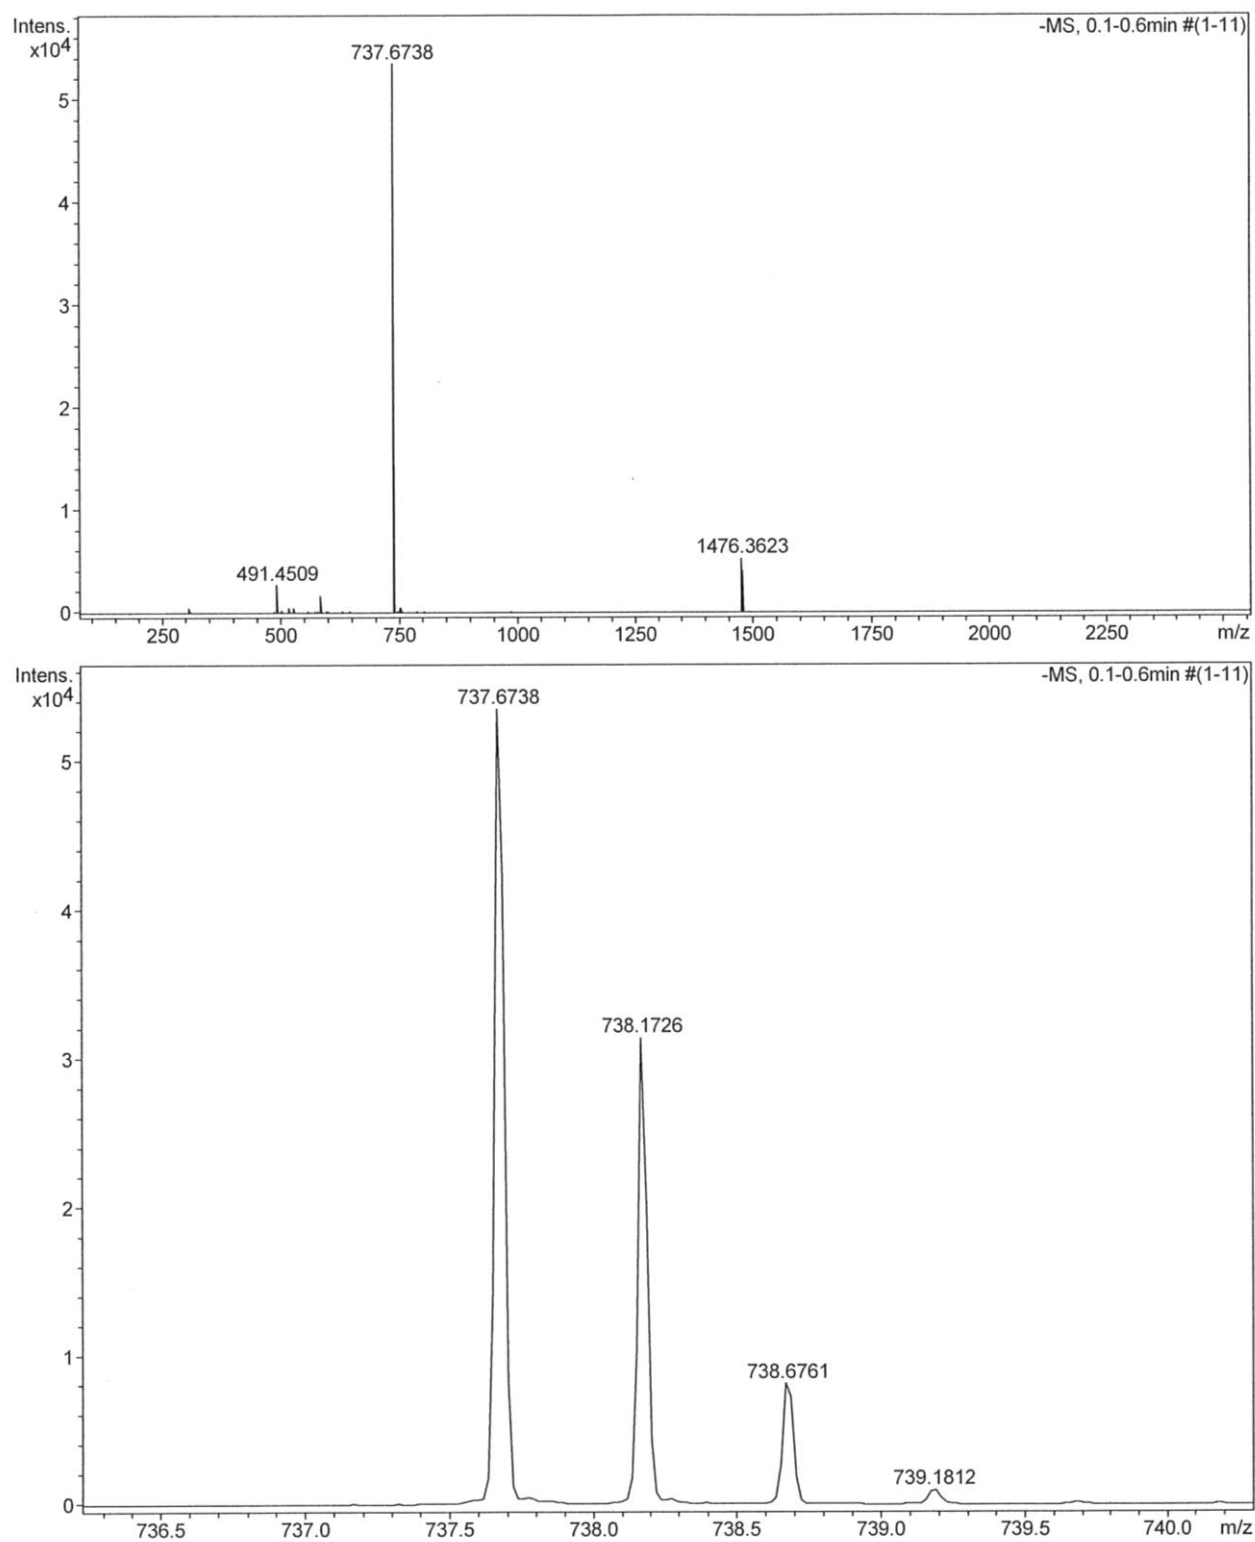

**Figure S3.** ESI mass spectrum of purified oligonucleotide **ON4a**

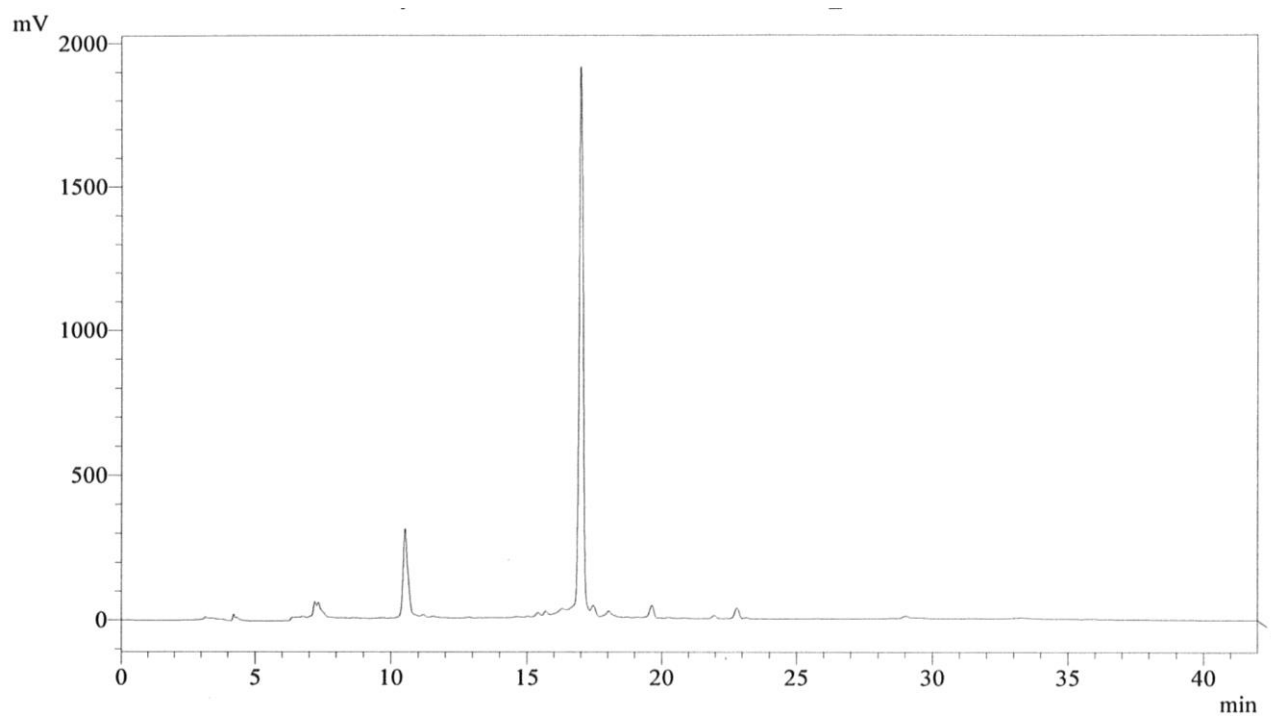

**Figure S4.** HPLC trace of crude oligonucleotide **ON4b**

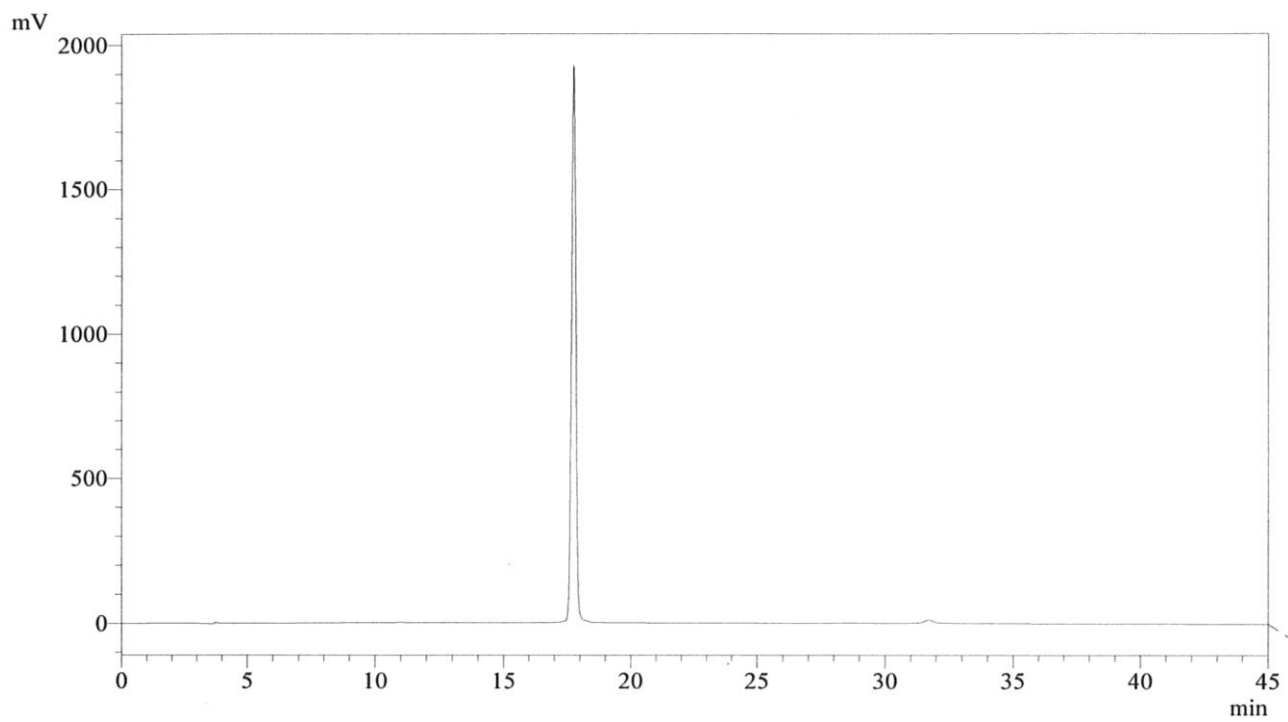

**Figure S5.** HPLC trace of purified oligonucleotide **ON4b**

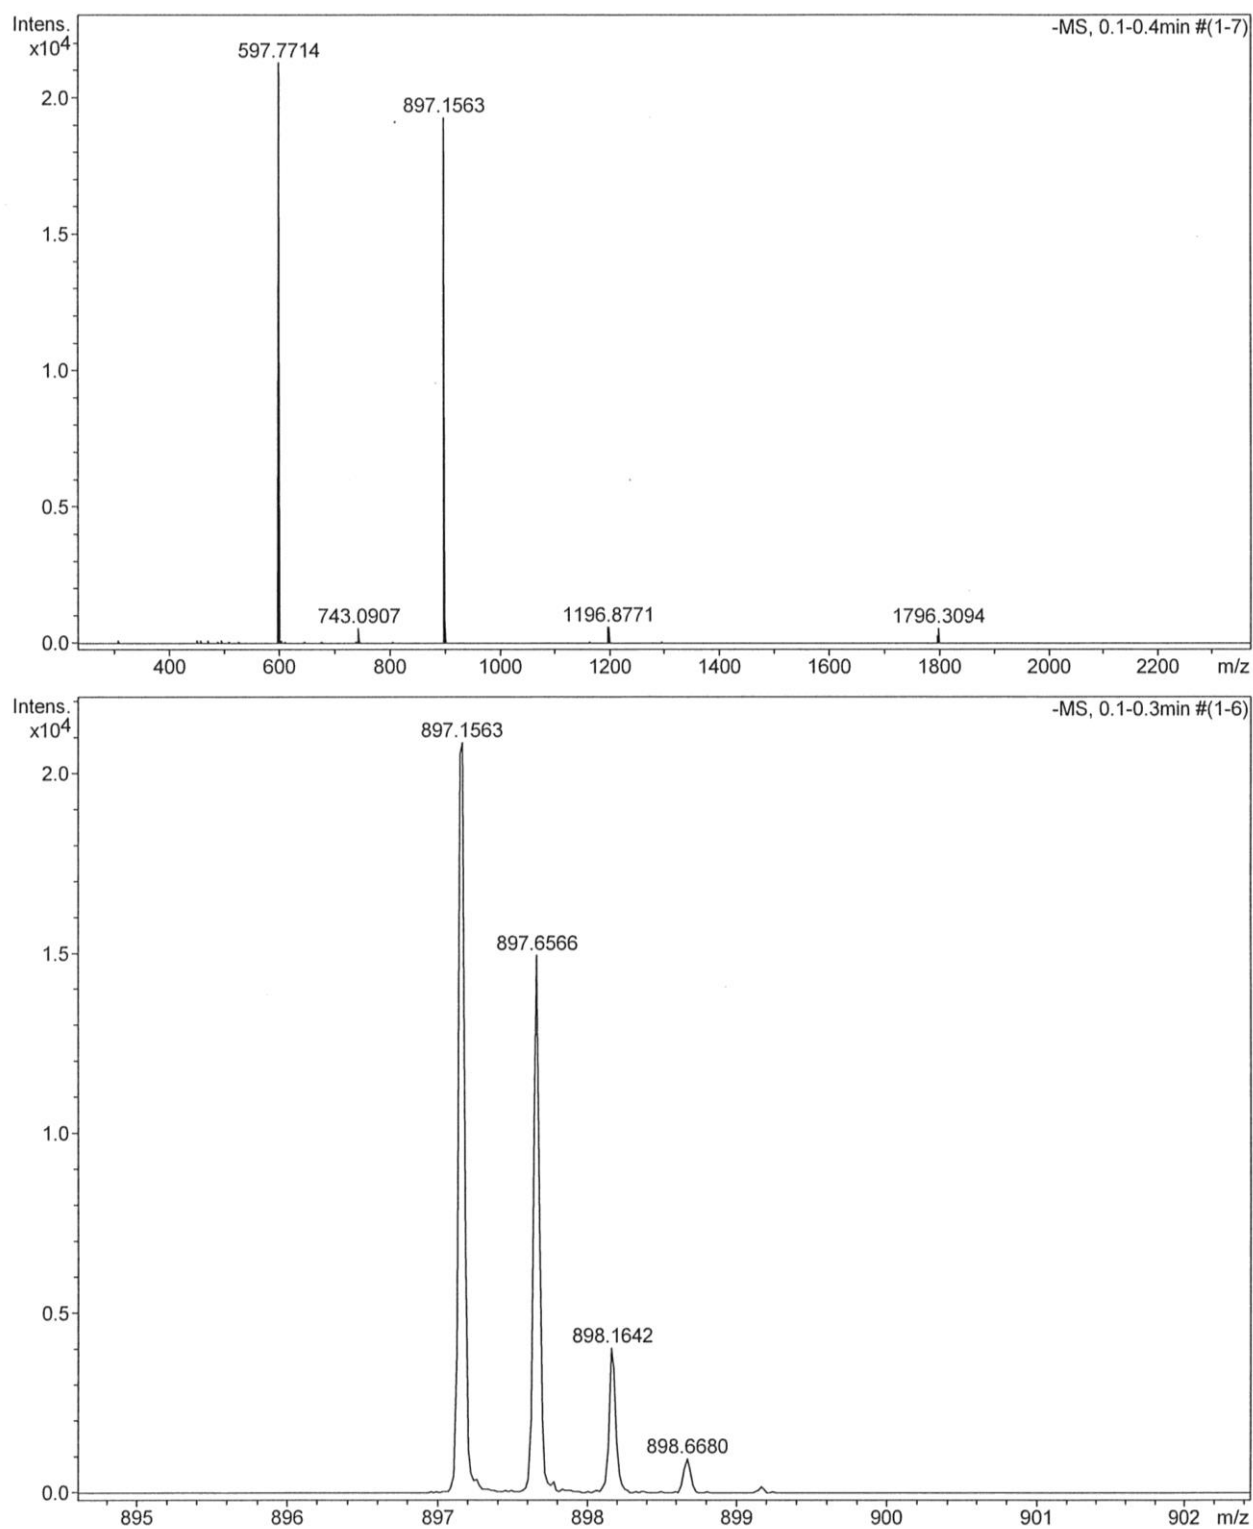

**Figure S6.** ESI mass spectrum of purified oligonucleotide **ON4b**

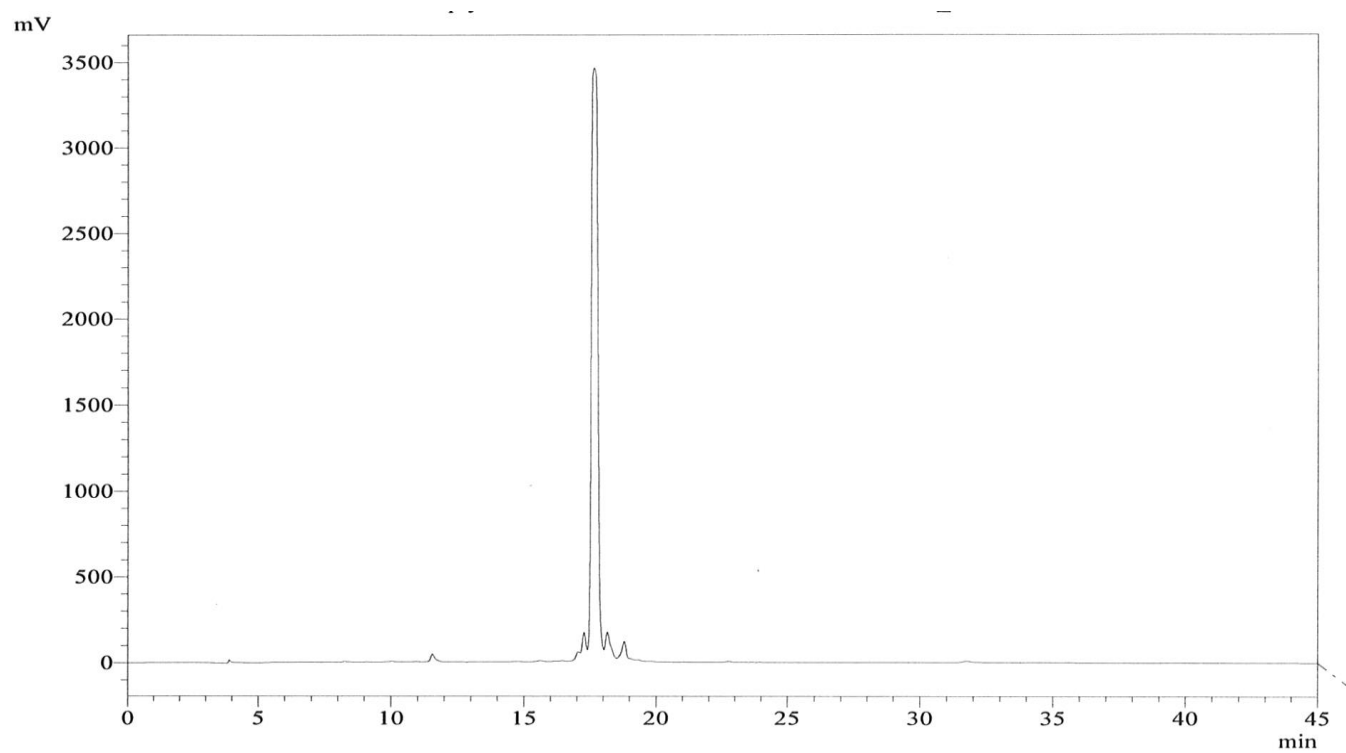

**Figure S7.** HPLC trace of crude oligonucleotide **ON4c**

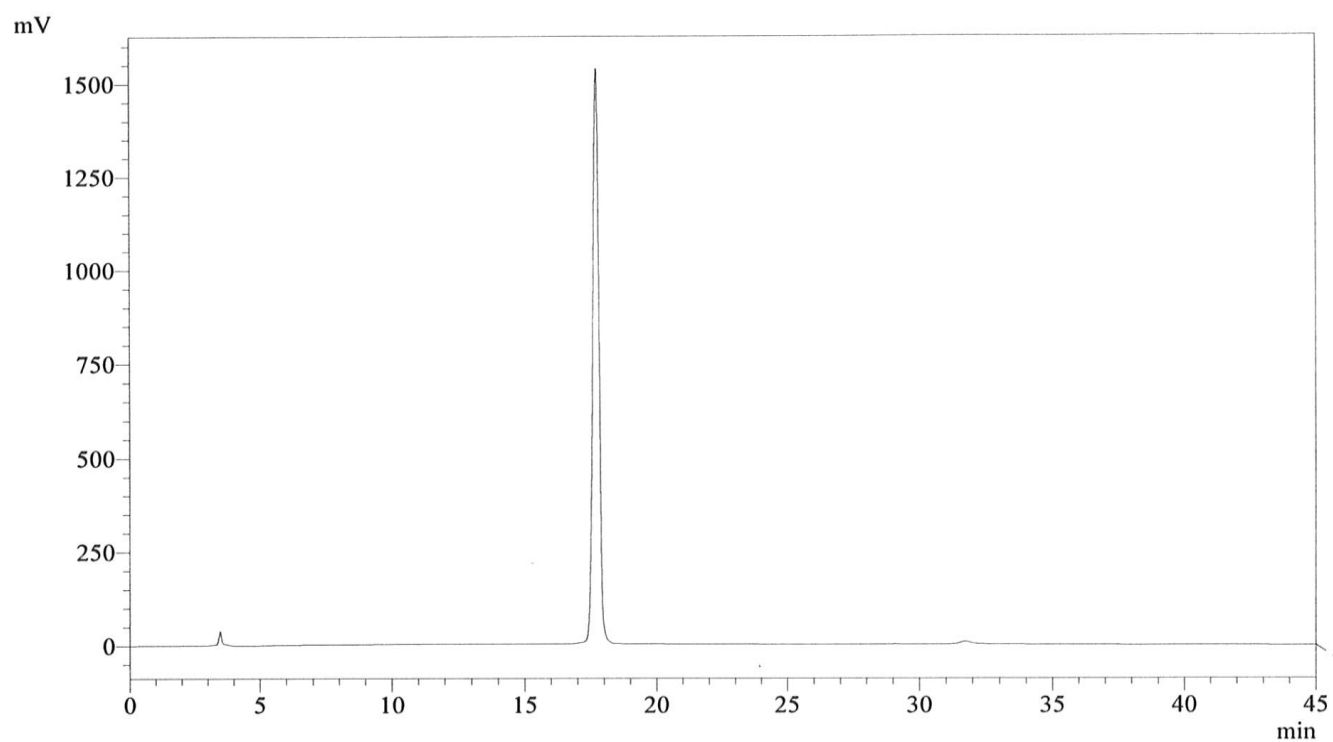

**Figure S8.** HPLC trace of purified oligonucleotide **ON4c**

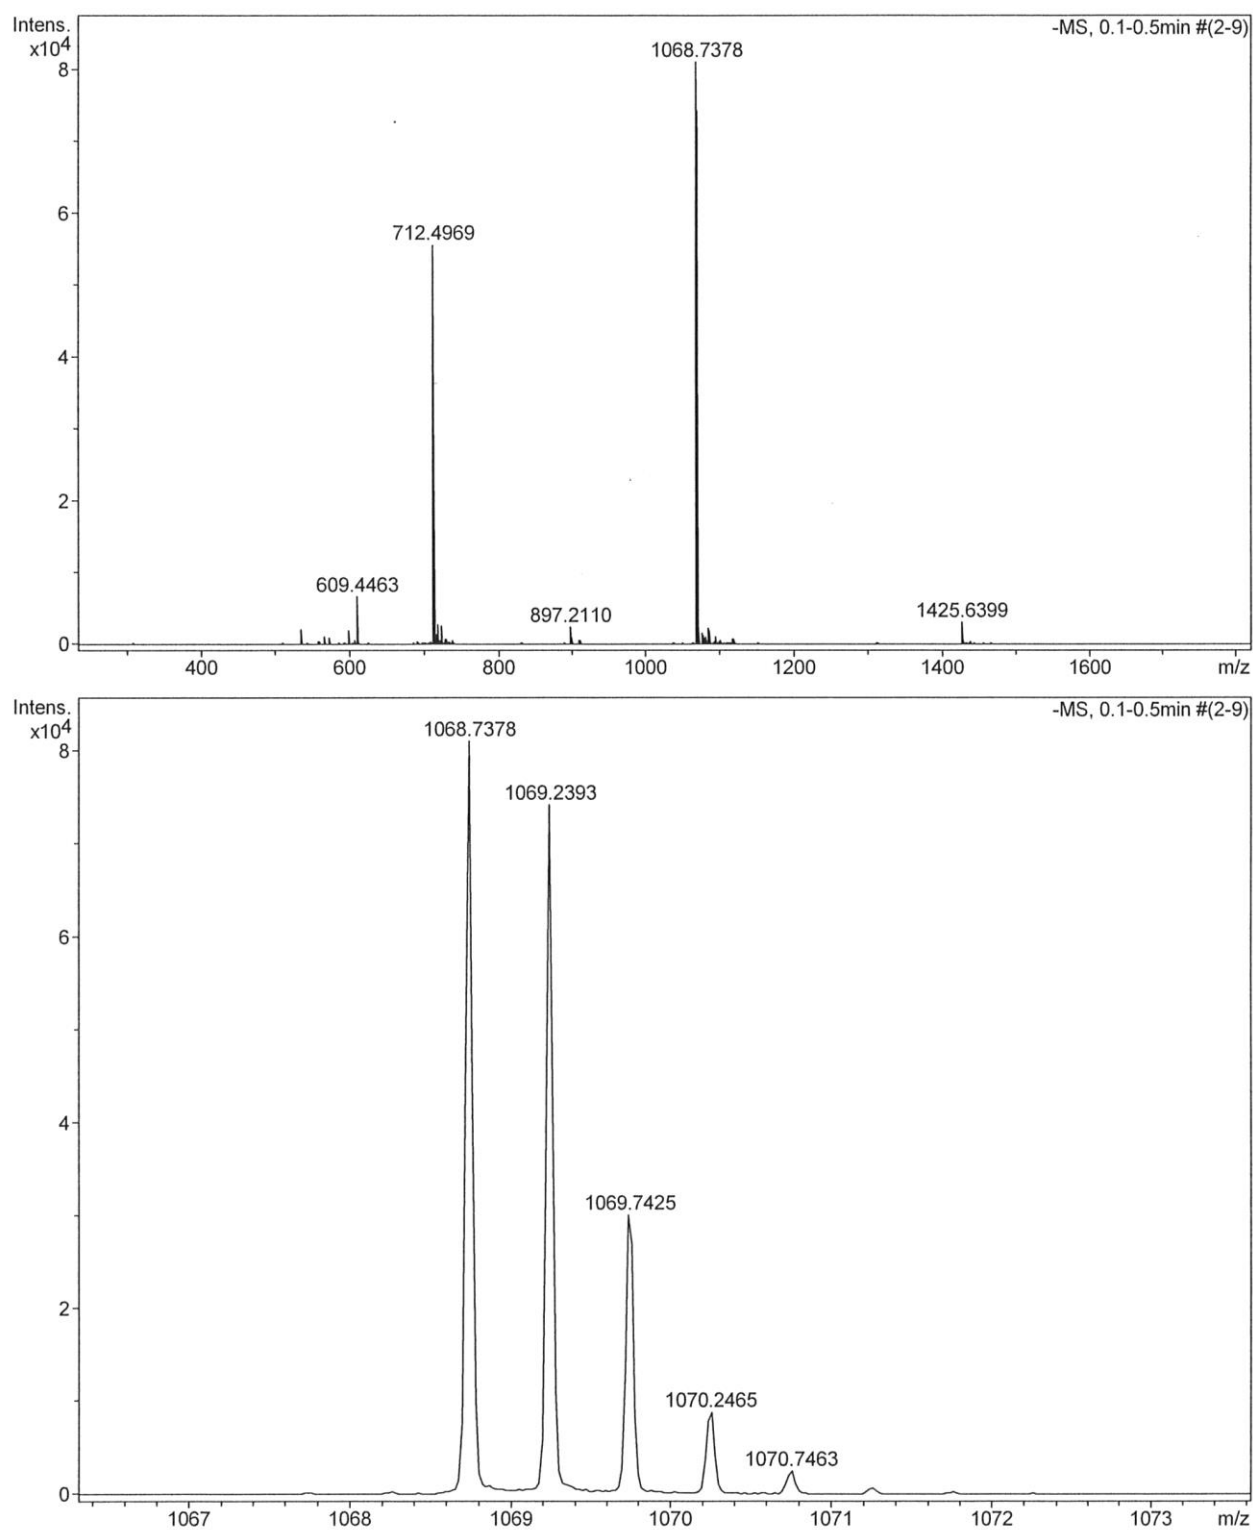

**Figure S9.** ESI mass spectrum of purified oligonucleotide **ON4c**

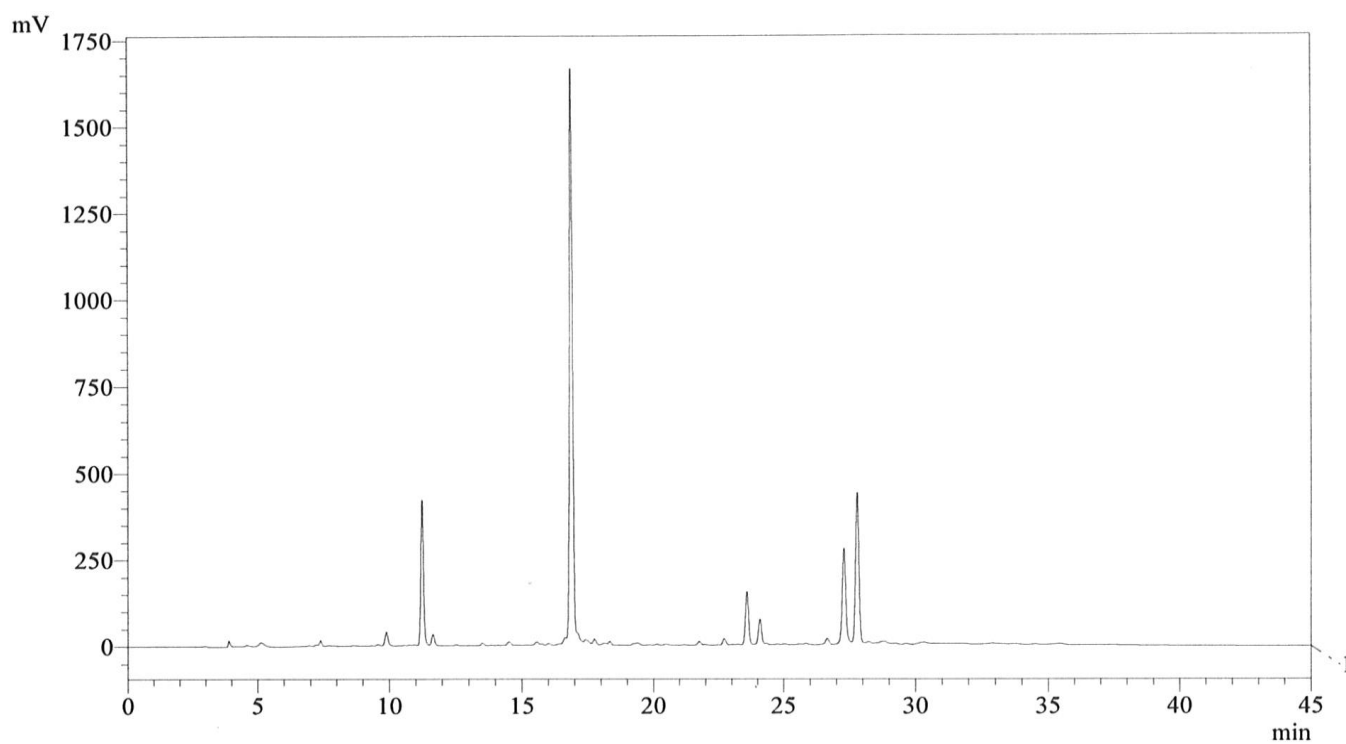

**Figure S10.** HPLC trace of crude oligonucleotide **ON5b**

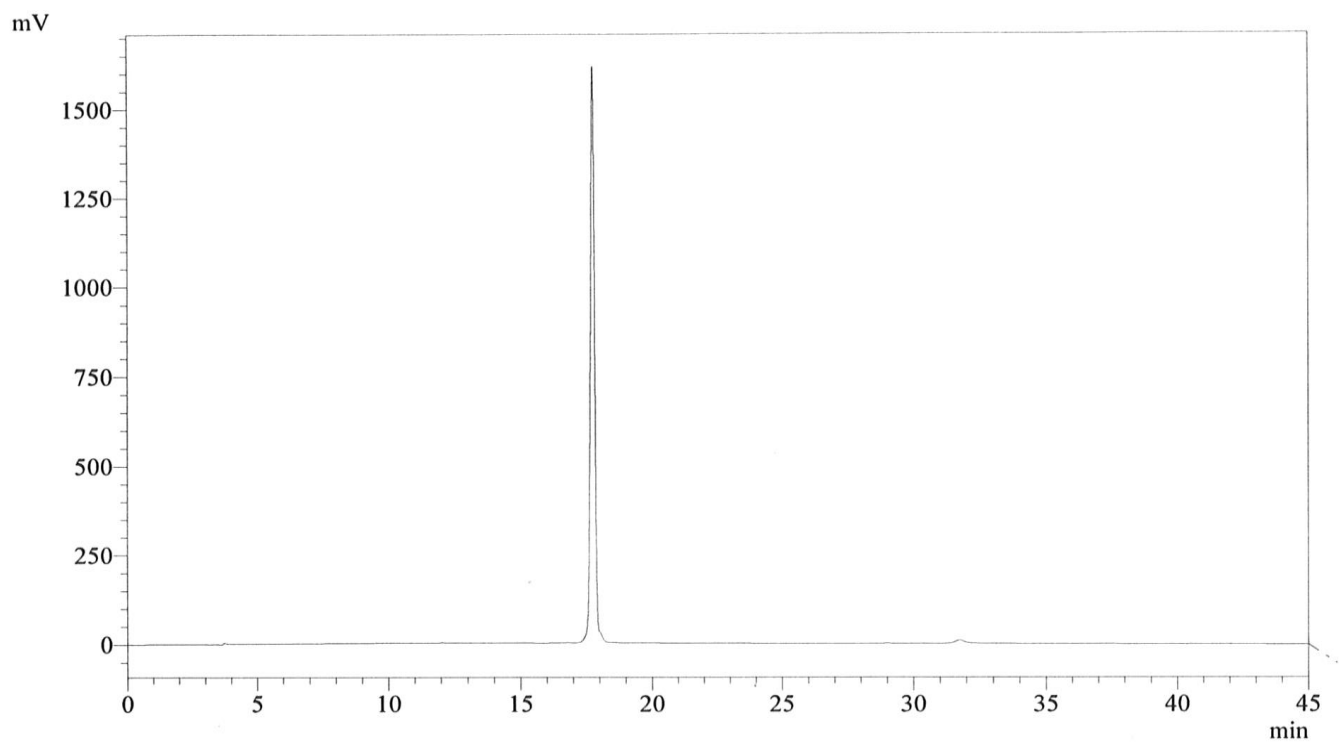

**Figure S11.** HPLC trace of purified oligonucleotide **ON5b**

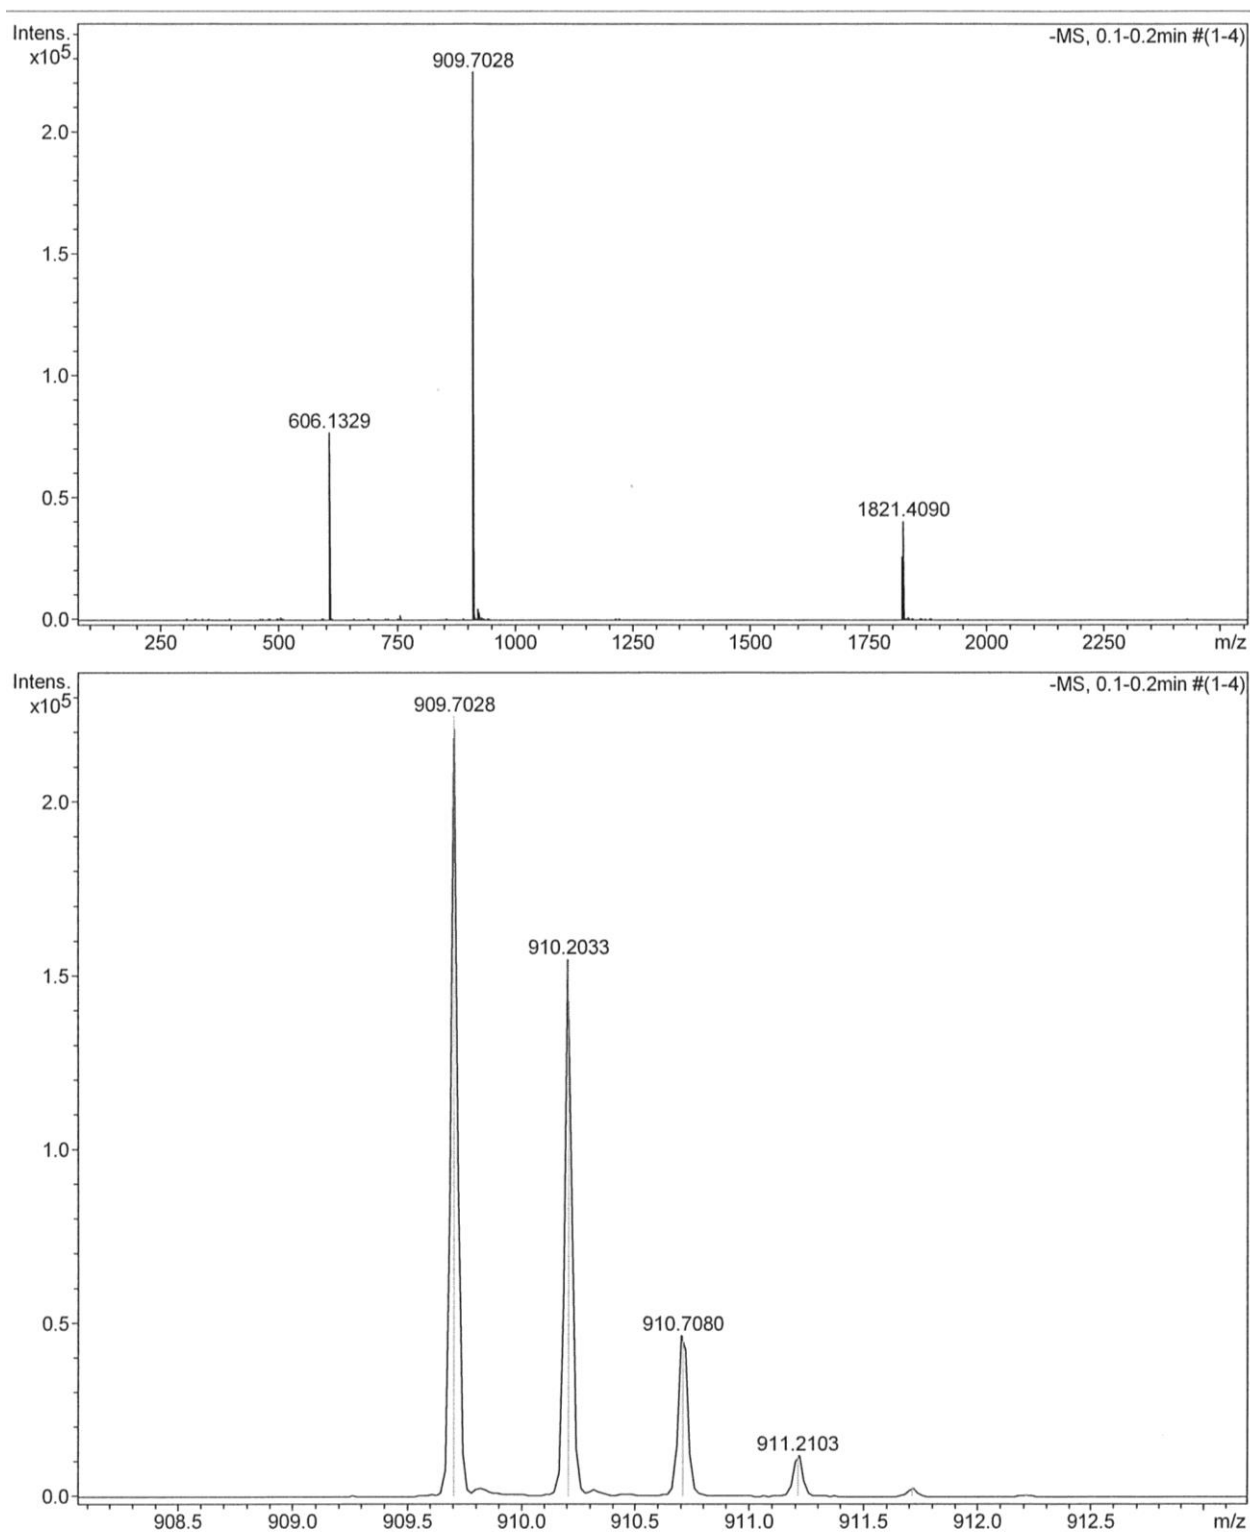

**Figure S12.** ESI mass spectrum of purified oligonucleotide **ON5b**

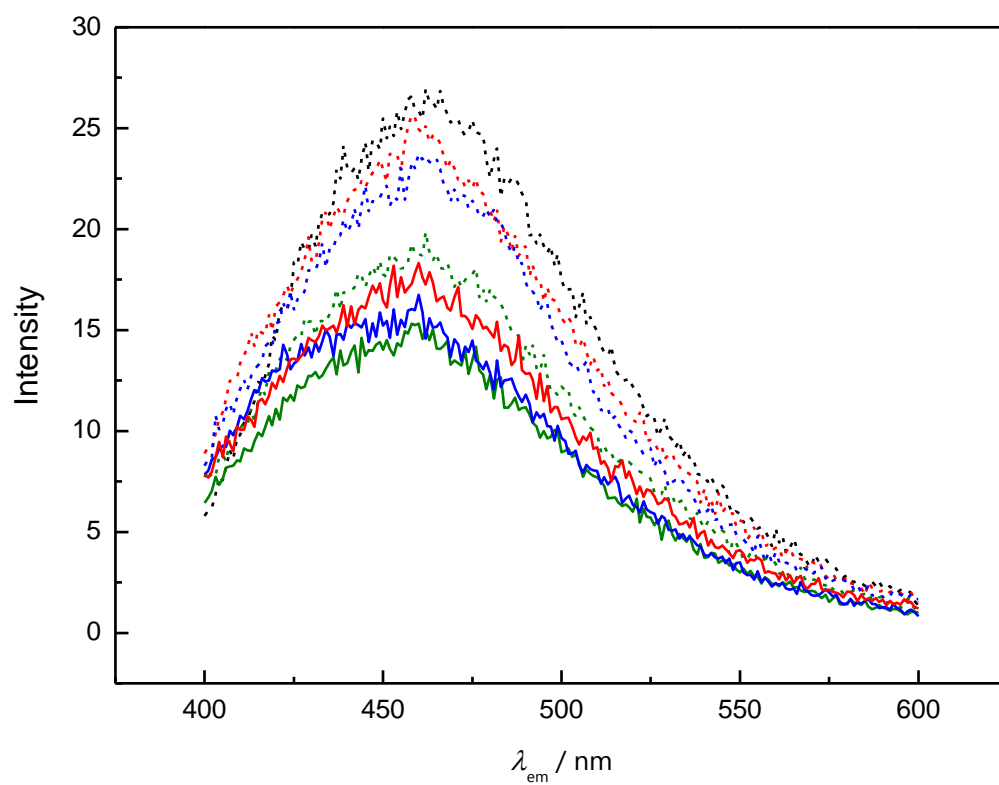

**Figure S13.** Fluorescence spectra of **ON1a** (black line) and duplexes **ON1a:ON4a** (red line), **ON1a:ON4b** (blue line) and **ON1a:ON4c** (green line) in the absence (dashed line) and presence (solid line) of  $\text{Cu}^{2+}$

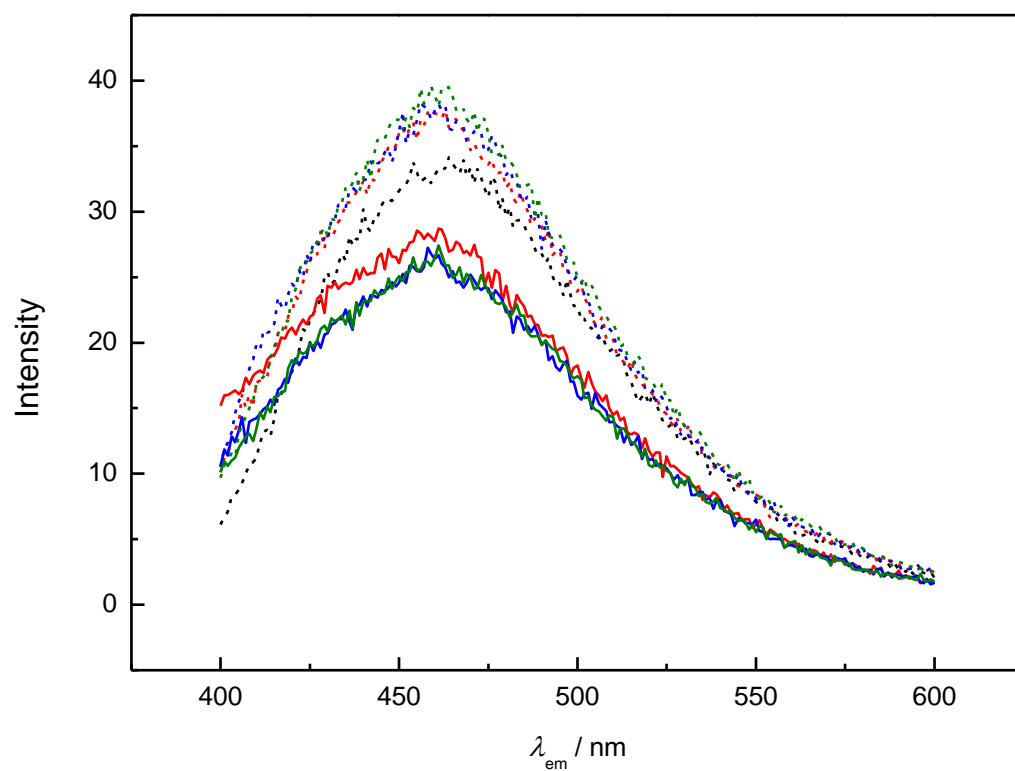

**Figure S14.** Fluorescence spectra of **ON2a** (black line) and duplexes **ON2a:ON4a** (red line), **ON2a:ON4b** (blue line) and **ON2a:ON4c** (green line) in the absence (dashed line) and presence (solid line) of  $\text{Cu}^{2+}$

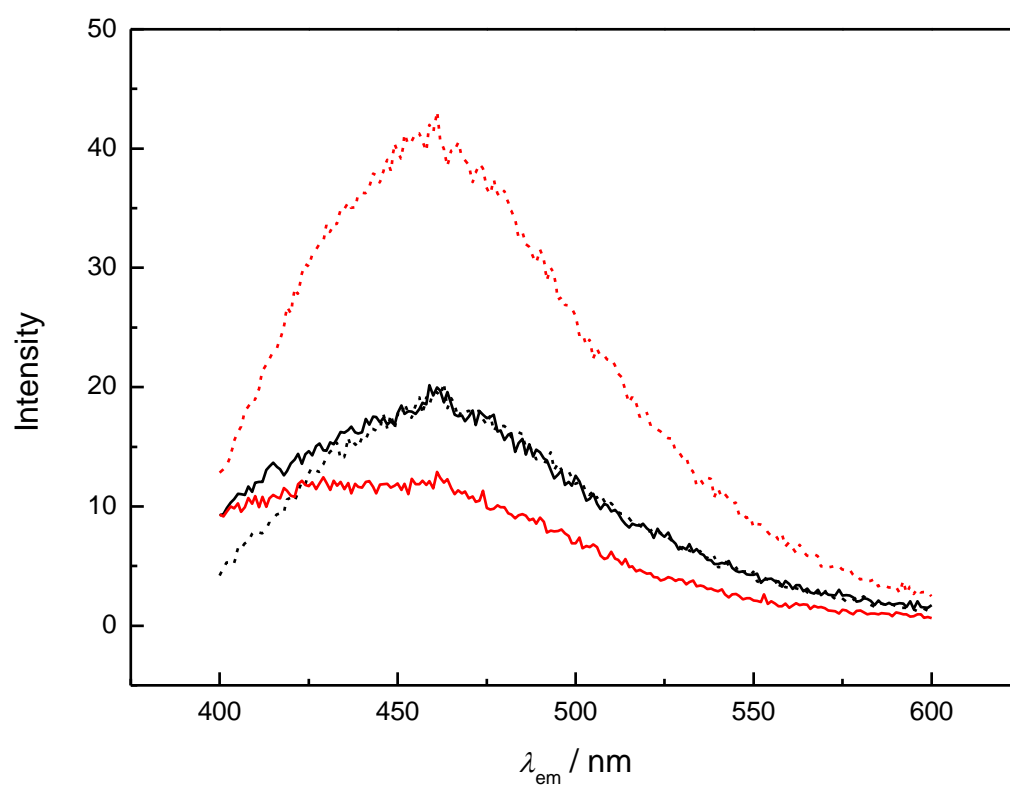

**Figure S15.** Fluorescence spectra of **ON2** (black line) and duplex **ON2:ON7** (red line) in the absence (dashed line) and presence (solid line) of  $\text{Cu}^{2+}$

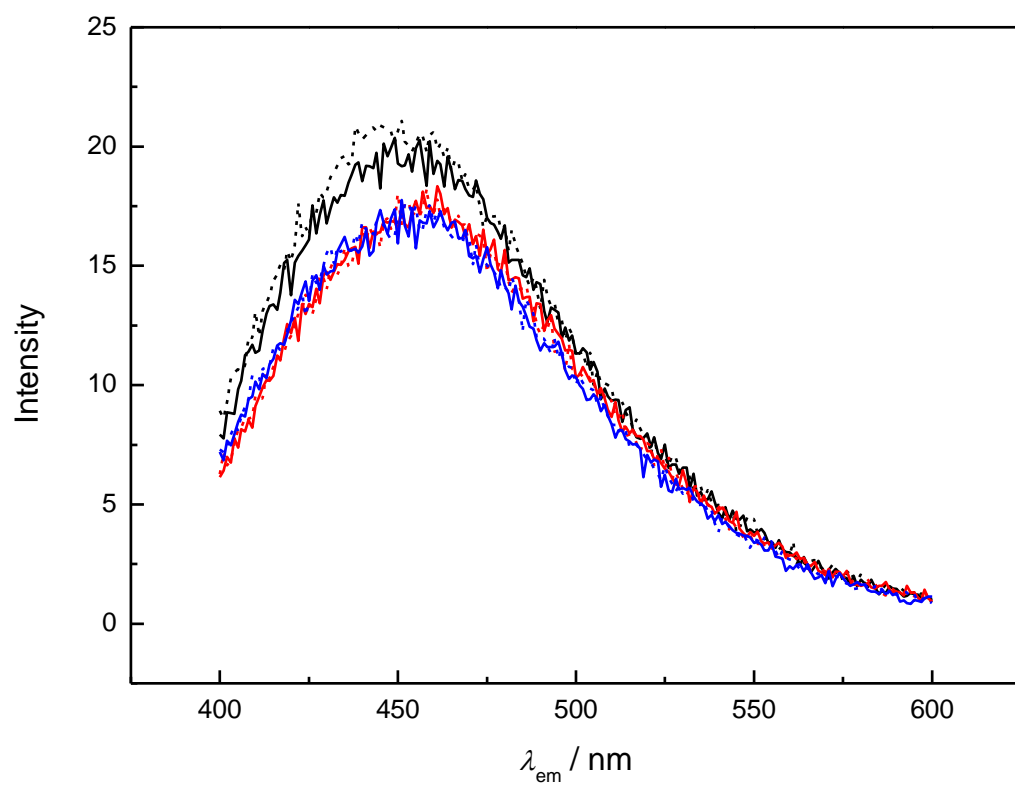

**Figure S16.** Fluorescence spectra of **ON3a** (black line) and duplexes **ON3a:ON5a** (red line) and **ON3a:ON5b** (blue line) in the absence (dashed line) and presence (solid line) of  $\text{Cu}^{2+}$

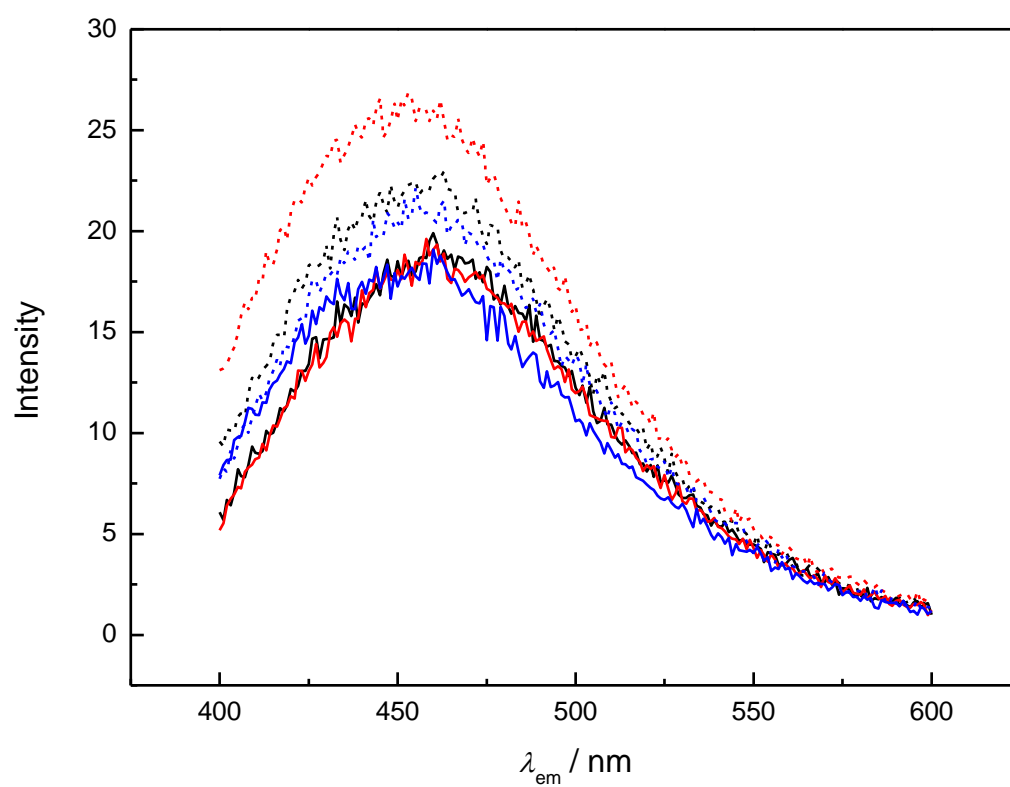

**Figure S17.** Fluorescence spectra of **ON3b** (black line) and duplexes **ON3b:ON5a** (red line) and **ON3b:ON5b** (blue line) in the absence (dashed line) and presence (solid line) of  $\text{Cu}^{2+}$

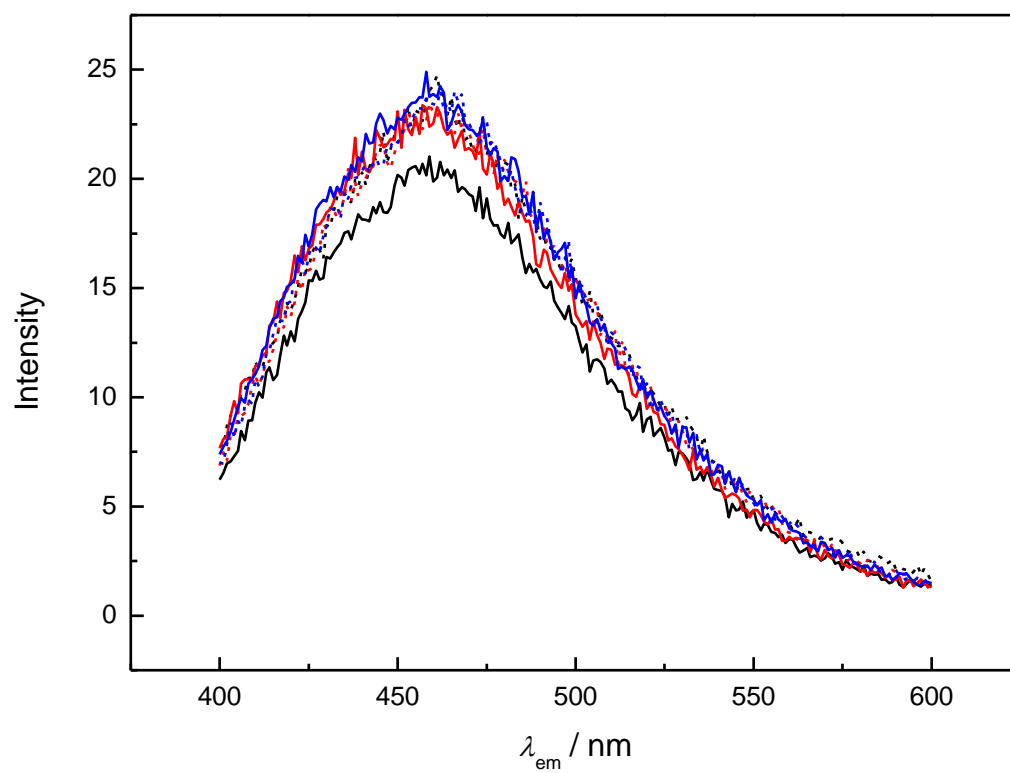

**Figure S18.** Fluorescence spectra of **ON3c** (black line) and duplexes **ON3c:ON5a** (red line) and **ON3c:ON5b** (blue line) in the absence (dashed line) and presence (solid line) of  $\text{Cu}^{2+}$

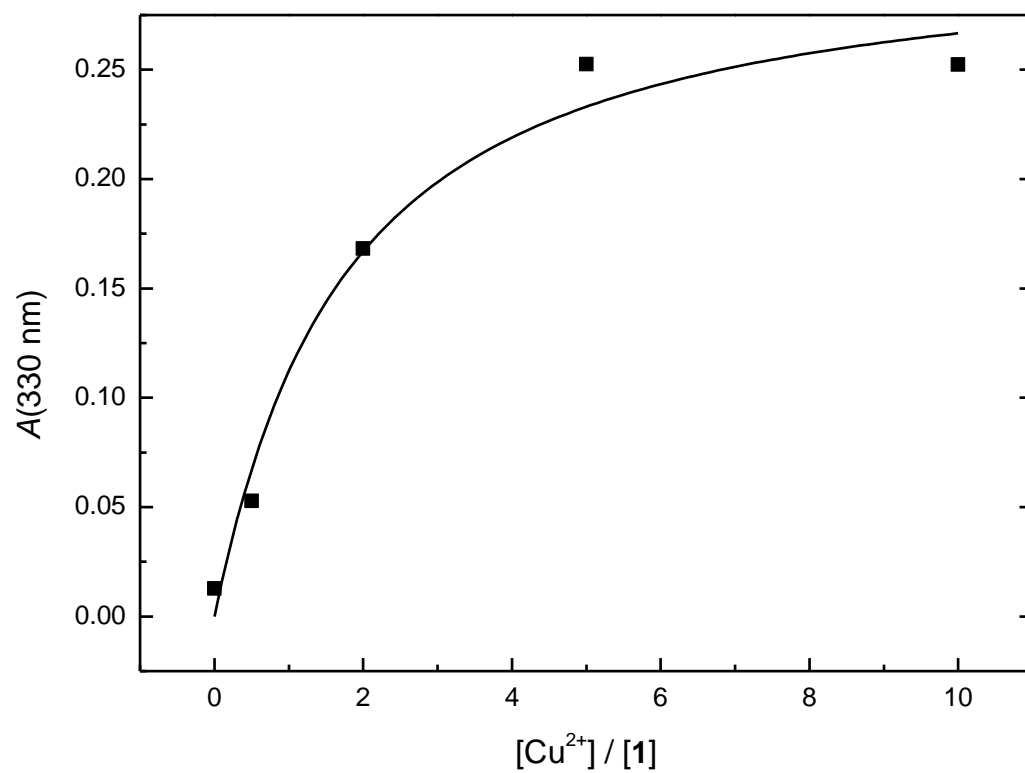

**Figure S19.** Absorbance of **1** at 330 nm as a function of  $[\text{Cu}^{2+}]$ ;  $T = 25\text{ }^{\circ}\text{C}$ ;  $\text{pH} = 7.4$  ( $20\text{ mmol L}^{-1}$  cacodylate buffer);  $I(\text{NaClO}_4) = 0.10\text{ mol L}^{-1}$ .

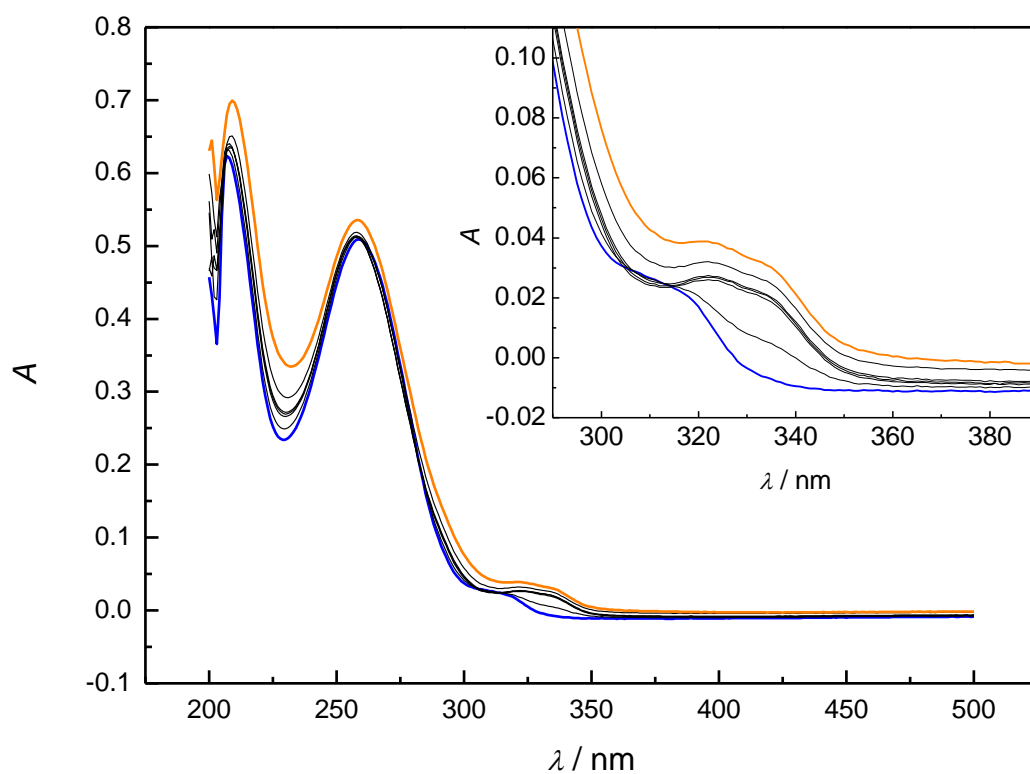

**Figure S20.** UV spectrum of duplex **ON1c:ON4c** in the presence of 0 (blue line), 0.5, 1.0, 1.5, 2.0, 5.0 and 10.0 eq. (orange line) of  $\text{CuSO}_4$ ;  $T = 25\text{ }^\circ\text{C}$ ;  $\text{pH} = 7.4$  (20  $\text{mmol L}^{-1}$  cacodylate buffer);  $I(\text{NaClO}_4) = 0.10\text{ mol L}^{-1}$ .
